# Supplementary material
Source: PubMed Central journal article supplement (PMC8769762)

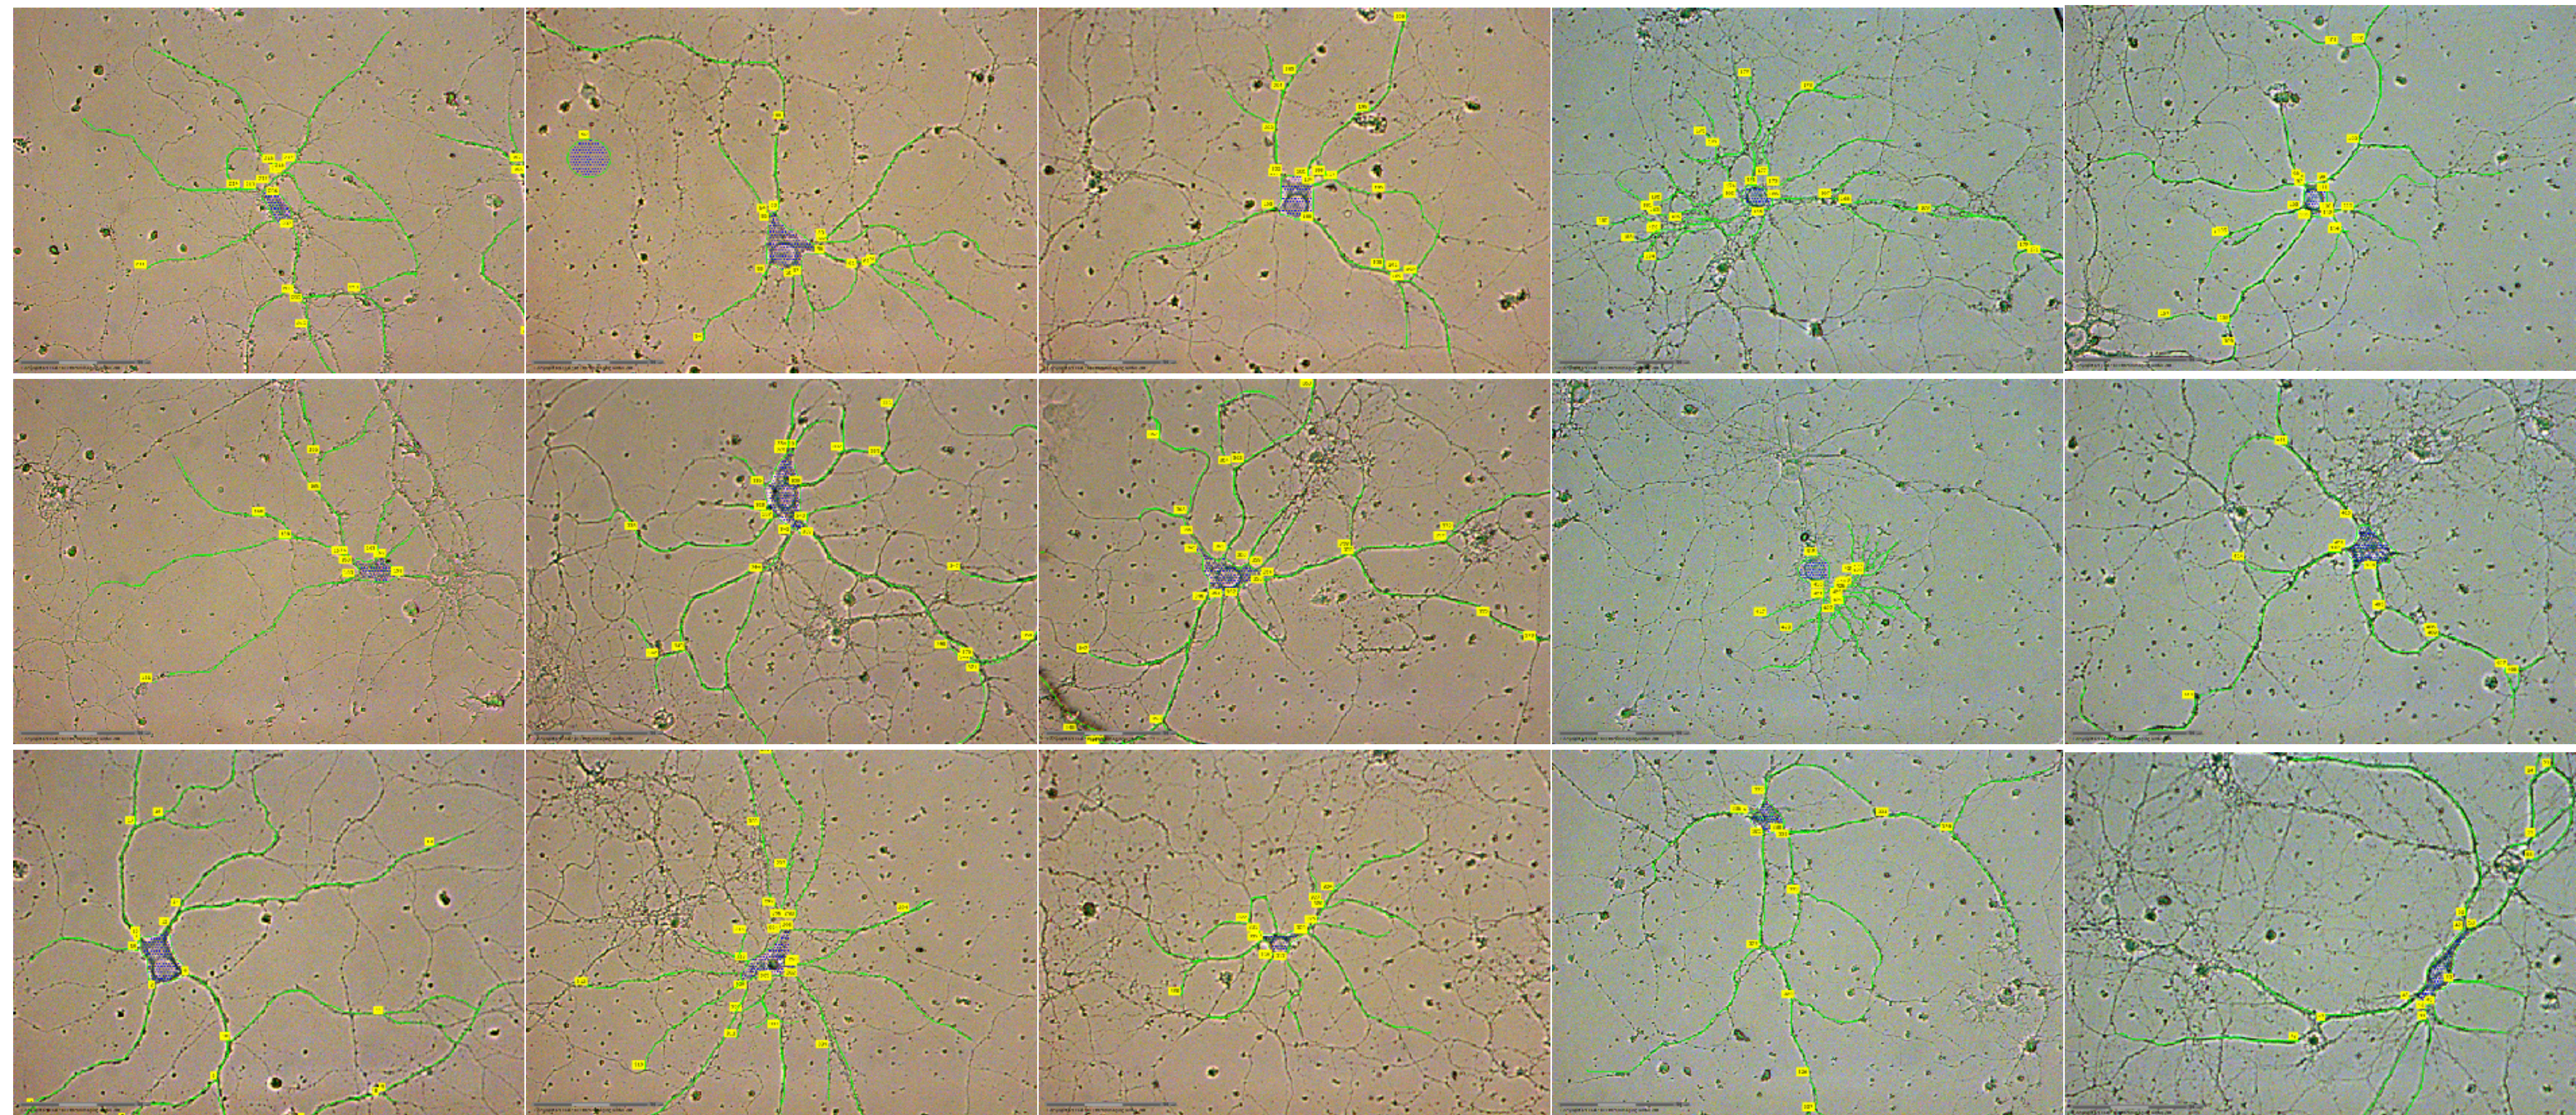

Supplement: BioProtoc-12-01-4278-s002.pdf [file BioProtoc-12-01-4278-s002.pdf]
